# Supplementary material
Source: publisher figshare collection journal article supplement (https://acs.figshare.com/ndownloader/files/22296051)
Supplement: Supplementary file 1 [file 22296051]

## Supporting Information

### Intracellular Photoactivation of Caspase-3 by Molecular Glues for Spatiotemporal Apoptosis Induction

Nina B. Hentzen,<sup>†</sup> Rina Mogaki,<sup>‡</sup> Saya Otake,<sup>‡</sup> Kou Okuro,<sup>\*,‡,§</sup> and Takuzo Aida<sup>\*,‡,||</sup>

<sup>†</sup>*Laboratorium für Organische Chemie, ETH Zürich*

*D-CHAB, Vladimir-Prelog-Weg 3, 8093, Zürich, Switzerland*

<sup>‡</sup>*Department of Chemistry and Biotechnology, School of Engineering, The University of Tokyo*

*7-3-1 Hongo, Bunkyo-ku, Tokyo 113-8656, Japan*

<sup>§</sup>*Department of Chemistry, The University of Hong Kong, Pokfulam Road, Hong Kong, China*

<sup>||</sup>*Riken Center for Emergent Matter Science, 2-1 Hirosawa, Wako, Saitama 351-0198, Japan*

#### Table of Contents

|                                                                                |            |
|--------------------------------------------------------------------------------|------------|
| <b>1. General.....</b>                                                         | <b>S2</b>  |
| <b>2. Synthesis .....</b>                                                      | <b>S3</b>  |
| <b>3. Dynamic Light Scattering (DLS) and Zeta Potential Measurements .....</b> | <b>S4</b>  |
| <b>4. Confocal Laser Scanning Microscopy.....</b>                              | <b>S5</b>  |
| <b>5. Cell Viability Assay.....</b>                                            | <b>S12</b> |
| <b>6. References.....</b>                                                      | <b>S13</b> |

## 1. General

Photoirradiation was performed on an Optocode model LED-EXHD light-emitting diode (LED) light source equipped with a 365-nm LED lamp (EX-365). Differential interference contrast (DIC) and confocal laser scanning microscopies were performed on a Leica model TCS SP8 confocal laser-scanning microscope. Electronic absorption spectra were recorded on a Molecular Devices SpectraMax<sup>®</sup> Paradigm<sup>®</sup> multi-mode microplate detection platform. Zeta potential measurements were performed using a Malvern model Zetasizer Nano ZS particle size analyzer equipped with a 532-nm frequency doubled diode-pumped solid-state (DPSS) laser light source. Dynamic light scattering (DLS) analysis was performed using a Malvern model Zetasizer  $\mu$ V particle size analyzer equipped with an 830-nm laser light source. A Horiba type LAQUAtwin-pH-22B compact pH meter was used for pH measurements.

Unless otherwise noted, reagents and solvents were used as received from commercial sources without further purification. Human hepatocellular carcinoma Hep3B cells (HB-8064) were purchased from ATCC. Eagle's minimal essential medium (EMEM) was purchased from Thermo Fisher Scientific. Dulbecco's phosphate buffer saline (D-PBS) and glycerol were purchased from FUJIFILM Wako Pure Chemical Corporation. Fetal bovine serum (FBS) was purchased from GE Healthcare. Cell Counting Kit-8 was purchased from Dojindo. Lysotracker<sup>®</sup> Red was purchased from Lonza. Recombinant Human Caspase-3 Protein was purchased from R&D Systems. NucView<sup>®</sup> 530 Caspase-3 Substrate (1 mM in DMSO), was purchased from Biotium. Phosphate buffered saline (PBS, pH 7.4) was purchased from Nakalai Tesque.

## 2. Synthesis

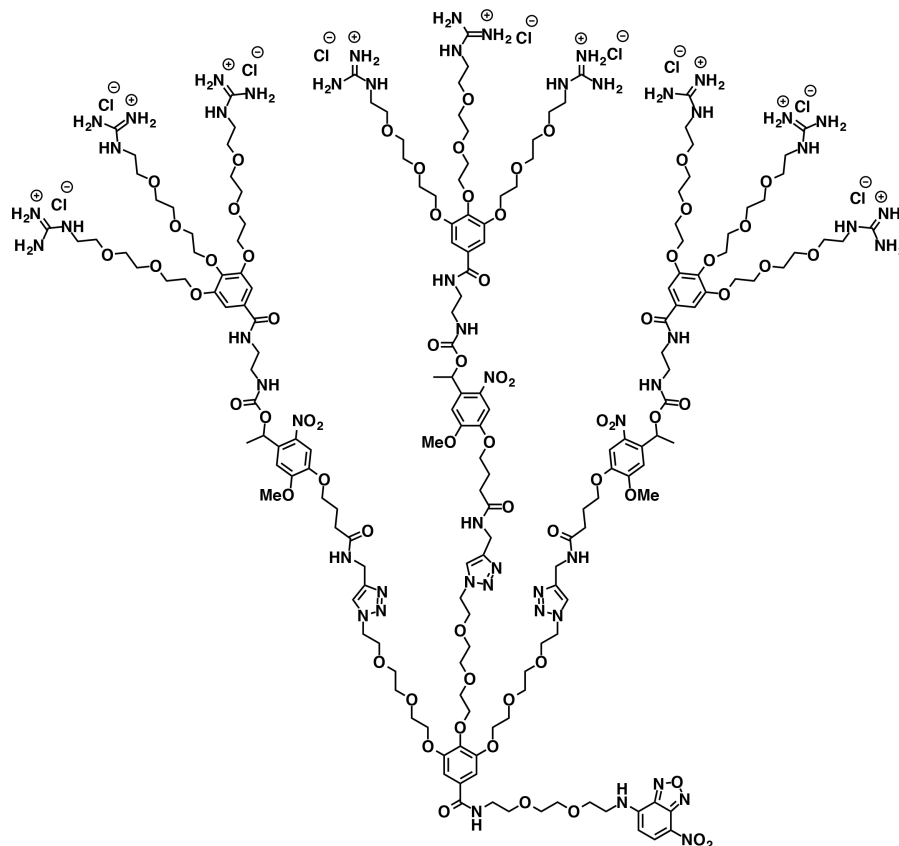

**<sup>PC</sup>Glue.** <sup>PC</sup>Glue was synthesized according to a method analogous to the reported procedure.<sup>S1</sup> In brief, azide-alkyne “click” reaction between a dendron carrying both a focal core appended with an alkyne group through a butyrate-substituted nitroveratryloxycarbonyl (<sup>BA</sup>NVOC) linkage and three *tert*-butoxycarbonyl (Boc)-protected guanidinium ion (Gu<sup>+</sup>) pendants and a dendron carrying both a nitrobenzoxadiazole (NBD)-substituted focal core and three azide (N<sub>3</sub>) pendants, followed by the removal of the Boc groups, yielded <sup>PC</sup>Glue as orange oil.

### **3. Dynamic Light Scattering (DLS) and Zeta Potential Measurements**

A PBS (15% glycerol, pH 7.4) solution of a mixture of caspase-3 (Casp-3, 0.4  $\mu\text{M}$ ) and  $^{125}\text{I}$ -Glue (10  $\mu\text{M}$ ) was subjected to dynamic light scattering (DLS) and zeta potential measurements. A PBS (15% glycerol, pH 7.4) solution of Casp-3 (0.4  $\mu\text{M}$ ) was also measured.



## 4. Confocal Laser Scanning Microscopy

### 4-1. Cellular Uptake of <sup>PC</sup>Glue/Casp-3

Human hepatocellular carcinoma Hep3B cells ( $1.0 \times 10^4$  cells/well; 8-chambered glass substrate, culture area =  $0.8 \text{ cm}^2/\text{well}$ ) were incubated at  $37^\circ\text{C}$  under 5%  $\text{CO}_2$  for 24 h in Eagle's minimal essential medium (EMEM,  $200 \mu\text{L}$ ) containing 10% fetal bovine serum (FBS). The cell sample was rinsed with Dulbecco's phosphate buffer saline (D-PBS,  $200 \mu\text{L} \times 2$ ), supplied with EMEM ( $200 \mu\text{L}$ ) containing <sup>PC</sup>Glue ( $1 \mu\text{M}$ ) and Casp-3 ( $40 \text{ nM}$ ), and incubated at  $37^\circ\text{C}$  under 5%  $\text{CO}_2$  for 3 h. Then, the cell sample was rinsed with D-PBS ( $200 \mu\text{L} \times 2$ ) and supplied with EMEM (10% FBS,  $200 \mu\text{L}$ ) containing LysoTracker Red ( $25 \text{ nM}$ ). After incubation at  $37^\circ\text{C}$  under 5%  $\text{CO}_2$  for 30 min, the resulting cell sample was subjected to confocal laser scanning microscopy ( $\lambda_{\text{ext}} = 488$  and  $552 \text{ nm}$ ). An analogous cell sample incubated at  $4^\circ\text{C}$  for 1 h was likewise prepared under otherwise identical conditions to the above.

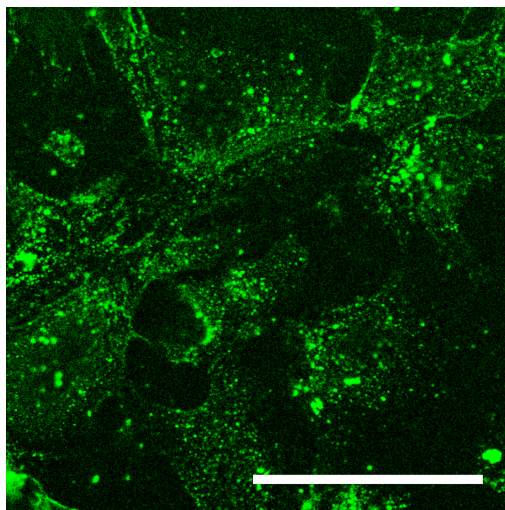

**Figure S1.** A confocal laser scanning micrograph ( $\lambda_{\text{ext}} = 488 \text{ nm}$ ,  $\lambda_{\text{obs}} = 500\text{--}530 \text{ nm}$ ) of Hep3B cells after 1 h incubation at  $4^\circ\text{C}$  in EMEM containing <sup>PC</sup>Glue ( $1 \mu\text{M}$ ) and Casp-3 ( $40 \text{ nM}$ ) followed by rinsing with D-PBS. Scale bar =  $50 \mu\text{m}$ .

### 4-2. Quantification of Casp-3 Activity in Hep3B Cells

Hep3B cells ( $1.0 \times 10^4$  cells/well; 8-chambered glass substrate, culture area =  $0.8 \text{ cm}^2/\text{well}$ ) were incubated at  $37^\circ\text{C}$  under 5%  $\text{CO}_2$  for 24 h in EMEM (10% FBS,  $200 \mu\text{L}$ ). The cell sample

was rinsed with D-PBS ( $200\ \mu\text{L} \times 2$ ), supplied with EMEM ( $200\ \mu\text{L}$ ) containing  $^{\text{PC}}$ Glue ( $1\ \mu\text{M}$ ) and Casp-3 ( $40\ \text{nM}$ ), and incubated at  $37\ ^\circ\text{C}$  under  $5\%\ \text{CO}_2$  for 3 h. Then, the cell sample was rinsed with D-PBS ( $200\ \mu\text{L} \times 2$ ), supplied with EMEM (10% FBS,  $200\ \mu\text{L}$ ), and exposed to UV light ( $\lambda = 365\ \text{nm}$ ,  $1.1\ \text{mW}/\text{mm}^2$ ) for 2 min. NucView ( $2\ \mu\text{M}$ ) was supplied to the cells followed by incubation of the resultant mixture at  $37\ ^\circ\text{C}$  under  $5\%\ \text{CO}_2$  for 18 h. The resulting cell sample was subjected to confocal laser scanning microscopy ( $\lambda_{\text{ext}} = 552\ \text{nm}$ ). An analogous cell sample without UV exposure was likewise prepared under otherwise identical conditions to the above. Likewise, reference cell samples in the presence of Casp-3 ( $40\ \text{nM}$ ) or  $^{\text{PC}}$ Glue ( $1\ \mu\text{M}$ ) as well as untreated cells before and after 2 min UV exposure at 365 nm were prepared under otherwise identical conditions to the above. Mean fluorescence intensities of the Hep3B cells were evaluated by using the ImageJ software.

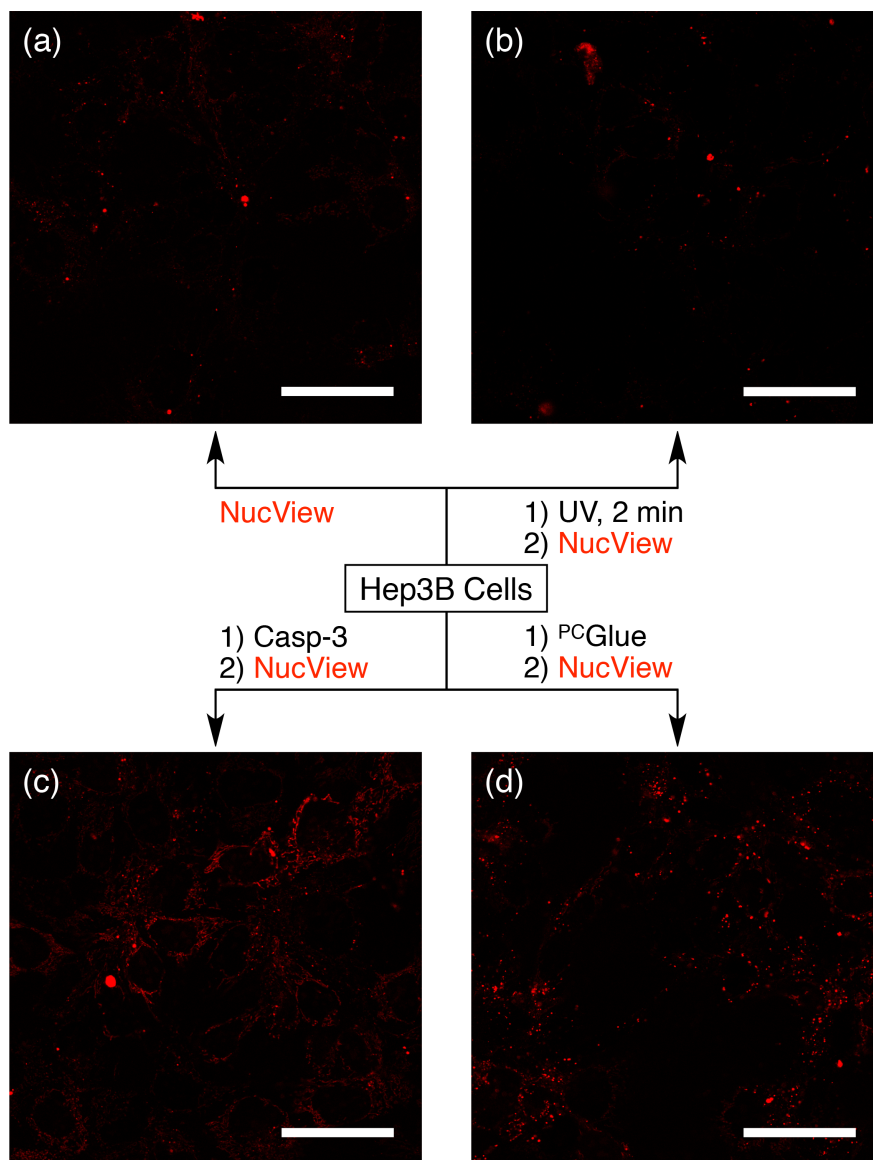

**Figure S2.** Confocal laser scanning micrographs ( $\lambda_{\text{ext}} = 552 \text{ nm}$ ,  $\lambda_{\text{obs}} = 565\text{--}620 \text{ nm}$ ) of Hep3B cells after 3 h incubation at 37 °C in EMEM in the absence (a, b) and presence of (c) Casp-3 (40 nM) or (d)  $^{\text{PC}}$ Glue (1  $\mu\text{M}$ ), followed by rinsing with D-PBS. The Hep3B cells were then incubated at 37 °C for 18 h in EMEM (10% FBS) containing NucView (2  $\mu\text{M}$ ) before (a,c,d) and after (b) 2 min UV exposure at 365 nm. Scale bars = 50  $\mu\text{m}$ .

#### 4-3. Quantification of Casp-3-active Hep3B Cells

Hep3B cells ( $1.0 \times 10^4$  cells/well; 8-chambered glass substrate, culture area = 0.8  $\text{cm}^2/\text{well}$ ) were incubated at 37 °C under 5%  $\text{CO}_2$  for 24 h in EMEM (10% FBS, 200  $\mu\text{L}$ ). The cell sample

was rinsed with D-PBS ( $200\ \mu\text{L} \times 2$ ), supplied with EMEM ( $200\ \mu\text{L}$ ) containing  $^{\text{PC}}$ Glue ( $1\ \mu\text{M}$ ) and Casp-3 ( $40\ \text{nM}$ ), and incubated at  $37\ ^\circ\text{C}$  under  $5\%\ \text{CO}_2$  for 3 h. Then, the cell sample was rinsed with D-PBS ( $200\ \mu\text{L} \times 2$ ), supplied with EMEM (10% FBS,  $200\ \mu\text{L}$ ), and exposed to UV light ( $\lambda = 365\ \text{nm}$ ,  $1.1\ \text{mW}/\text{mm}^2$ ) for 2 min. NucView ( $2\ \mu\text{M}$ ) was supplied to the cells followed by incubation of the resultant mixture at  $37\ ^\circ\text{C}$  under  $5\%\ \text{CO}_2$  for 18 h. The resulting cell sample was supplied with Hoechst 33342 ( $2.5\ \mu\text{g}/\text{mL}$ ) and then subjected to confocal laser scanning microscopy. Analogous cell samples without and with  $^{\text{PC}}$ Glue ( $1\ \mu\text{M}$ ) or Casp-3 ( $40\ \text{nM}$ ) were prepared under otherwise identical conditions to the above. Likewise, reference cell samples without UV exposure were prepared under otherwise identical conditions to the above.

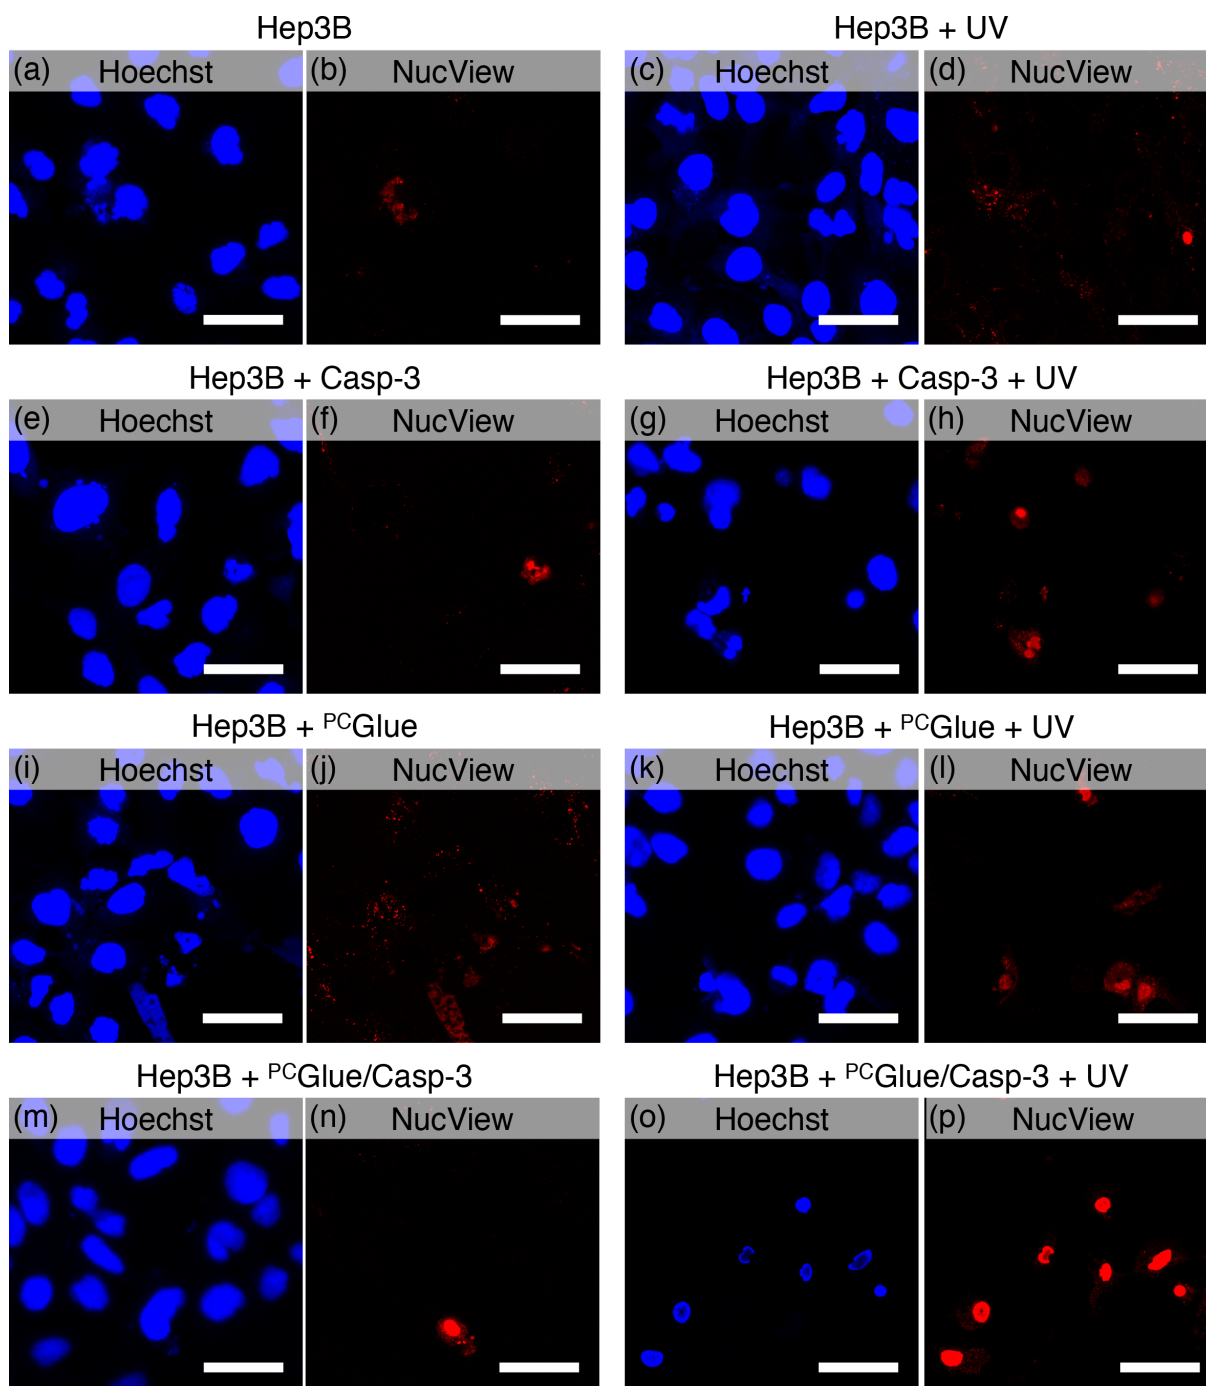

**Figure S3.** Confocal laser scanning micrographs of Hep3B cells after 3 h incubation at 37 °C in EMEM in the absence (a–d) and presence of Casp-3 (40 nM; e–h), <sup>PC</sup>Glue (1  $\mu$ M; i–l), or <sup>PC</sup>Glue/Casp-3 ([<sup>PC</sup>Glue] = 1  $\mu$ M, [Casp-3] = 40 nM; m–p), followed by rinsing with D-PBS. The Hep3B cells were incubated at 37 °C for 18 h in EMEM (10% FBS) containing NucView (2  $\mu$ M) before (a, b, e, f, i, j, m, n) and after (c, d, g, h, k, l, o, p) 2 min UV exposure at 365 nm. Micrographs

recorded upon excitation at 405 nm ( $\lambda_{\text{obs}} = 420\text{--}470$  nm; a, c, e, g, i, k, m, o) and 552 nm ( $\lambda_{\text{obs}} = 570\text{--}660$  nm; b, d, f, h, j, l, n, p). Scale bars = 50  $\mu\text{m}$ .

**Table S1.** Rates of apoptotic Hep3B cells estimated from confocal laser scanning micrographs as the ratio of the number of Casp-3 active cells to the number of total cells.<sup>S2</sup>

| Cell Sample                            | Apoptotic Cells (%) |
|----------------------------------------|---------------------|
| Hep3B                                  | 7                   |
| Hep3B + UV                             | 6                   |
| Hep3B + Casp-3                         | 13                  |
| Hep3B + Casp-3 + UV                    | 29                  |
| Hep3B + <sup>PC</sup> Glue             | 9                   |
| Hep3B + <sup>PC</sup> Glue + UV        | 20                  |
| Hep3B + <sup>PC</sup> Glue/Casp-3      | 13                  |
| Hep3B + <sup>PC</sup> Glue/Casp-3 + UV | 77                  |

#### 4-4. Photoactivation of Casp-3 by Two-photon NIR Light in Hep3B Cells

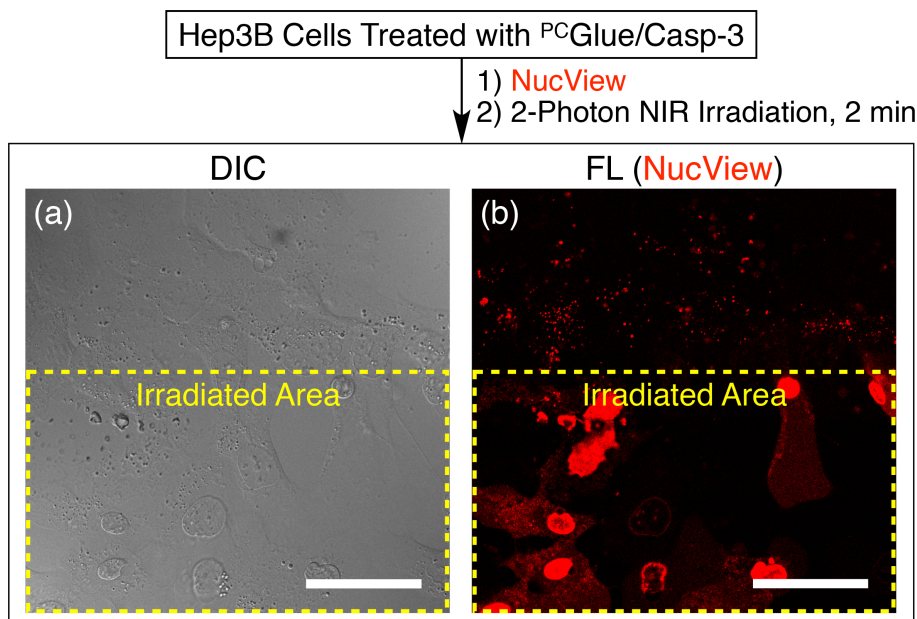

**Figure S4.** (a) Differential interference contrast (DIC) and (b) confocal laser scanning micrographs upon excitation at 514 nm ( $\lambda_{\text{obs}} = 540\text{--}660$  nm) of Hep3B cells. Hep3B cells were incubated at 37 °C for 3 h in EMEM containing a mixture of <sup>PC</sup>Glue (1  $\mu\text{M}$ ) and Casp-3 (40 nM), rinsed with

D-PBS, and then incubated at 37 °C for 18 h in EMEM (10% FBS) containing NucView (2  $\mu$ M), followed by two-photon irradiation at 710 nm for 2 min. The yellow dashed boxes in (a) and (b) represent the irradiated area. Scale bars = 50  $\mu$ m.

## 5. Cell Viability Assay

Hep3B cells ( $5.0 \times 10^3$  cells/well; 96-well culture plate, culture area =  $0.33 \text{ cm}^2/\text{well}$ ) were incubated in EMEM (10% FBS,  $100 \mu\text{L}$ ) at  $37^\circ\text{C}$  under 5%  $\text{CO}_2$  for 24 h. The cell sample was rinsed with D-PBS ( $100 \mu\text{L} \times 2$ ) and supplied with EMEM (10% FBS,  $100 \mu\text{L}$ ) containing  $^{\text{PC}}$ Glue ( $1 \mu\text{M}$ ) and Casp-3 ( $50 \text{ nM}$ ). After incubation at  $37^\circ\text{C}$  under 5%  $\text{CO}_2$  for 13 h, the cell sample was rinsed with D-PBS ( $100 \mu\text{L} \times 2$ ) and supplied with EMEM (10% FBS,  $100 \mu\text{L}$ ), which was exposed to UV light ( $\lambda = 365 \text{ nm}$ ,  $1.1 \text{ mW}/\text{mm}^2$ ) for 2 min prior to incubation. After incubation at  $37^\circ\text{C}$  under 5%  $\text{CO}_2$  for 90 min, Cell Counting Kit-8 reagent ( $10 \mu\text{L}$ ) was supplied to the cells followed by incubation of the resultant mixture at  $37^\circ\text{C}$  under 5%  $\text{CO}_2$  for 1 h. An analogous cell sample without UV exposure was likewise prepared under otherwise identical conditions to the above. The cell samples thus prepared were subjected to absorption spectroscopy ( $\lambda = 450 \text{ nm}$ ).

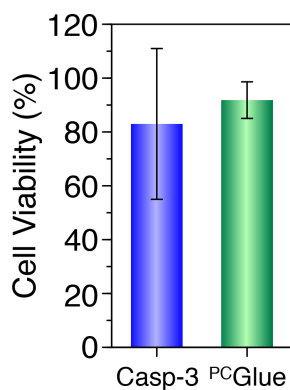

**Figure S5.** Viabilities of Hep3B cells after 12 h incubation at  $37^\circ\text{C}$  in EMEM (10% FBS) containing Casp-3 ( $50 \text{ nM}$ , blue) or  $^{\text{PC}}$ Glue ( $1 \mu\text{M}$ , green).



## 6. References

- S1. Mogaki, R.; Okuro, K.; Ueki, R.; Sando, S.; Aida, T. Molecular Glue that Spatiotemporally Turns on Protein–Protein Interactions. *J. Am. Chem. Soc.* **2019**, *141*, 8035–8040.
- S2. Prieto, A.; Diaz, D.; Barcenilla, H.; Garcia-Suárez, J.; Eduardo, R.; Monserrat, J.; Antonio, E. S.; Melero, D.; de la Hera, A.; Orfao, A.; Alvarez-Mon, M. Apoptotic Rate: A New Indicator for the Quantification of the Incidence of Apoptosis in Cell Cultures. *Cytometry, Part A* **2002**, *48*, 185–193.
